# Supplementary material for: OCT3 promoter haplotype is associated with metformin pharmacokinetics in Koreans
Source: PubMed Central journal article supplement (PMC6240047; doi:10.1038/s41598-018-35322-6), 2018-11-16
Supplement: 41598_2018_35322_MOESM1_ESM.pdf [file 41598_2018_35322_MOESM1_ESM.pdf]

## Supplementary Information For

### ***OCT3* promoter haplotype is associated with metformin pharmacokinetics in Koreans**

Eun Young Kwon<sup>1,3</sup>, Jae-Yong Chung<sup>2,3</sup>, Hyo Jin Park<sup>1</sup>, Bo Min Kim<sup>1</sup>, Minsuk Kim<sup>1</sup>, Ji Ha Choi<sup>1,\*</sup>

<sup>1</sup>Department of Pharmacology, Tissue Injury Defense Research Center, College of Medicine, Ewha Womans University, Seoul, Korea

<sup>2</sup>Department of Clinical Pharmacology and Therapeutics, Seoul National University College of Medicine and Bundang Hospital, Seoul, Korea

<sup>3</sup>EYK and JC contributed equally to this study.

\*Corresponding author: jihachoi@ewha.ac.kr

#### **Corresponding author**

Ji Ha Choi, M.D., Ph.D.

Department of Pharmacology, Tissue Injury Defense Research Center, College of Medicine, Ewha Womans University, Seoul, Korea

1071 Anyangcheon-ro, Yangcheon-gu, Seoul, 07985, Korea

Phone: +82-2-2650-5746; Fax: +82-2-2653-8891; E-mail: jihachoi@ewha.ac.kr

Supplementary Figure S1. Linkage disequilibrium structures of *OCT3* promoter variations

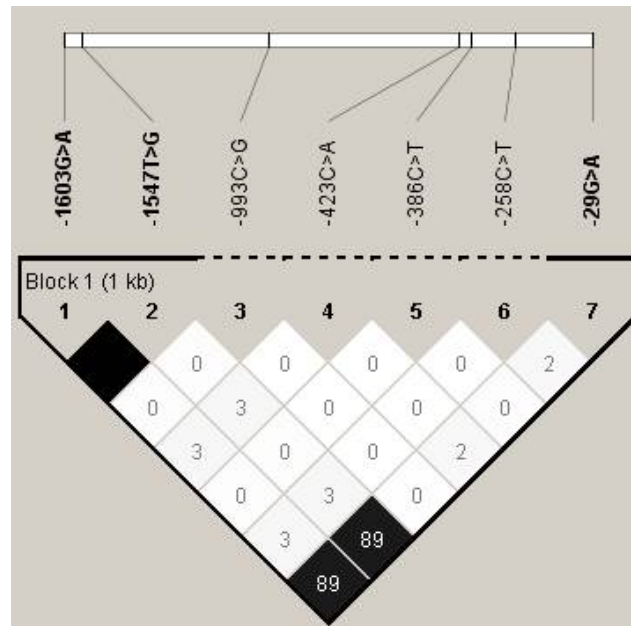

The number in the diamond indicates the  $r^2$  value. A black diamond without a number means an  $r^2$  value of 1.

Supplementary Figure S2. Luciferase activity of the *OCT3* promoter haplotype H5

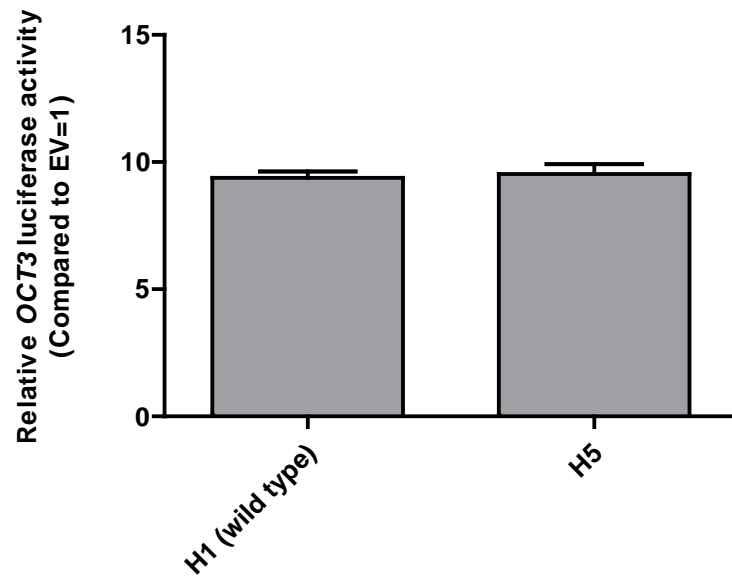

**Supplementary Figure S3. Full-length images of the cropped gels presented in the main Figure 2**

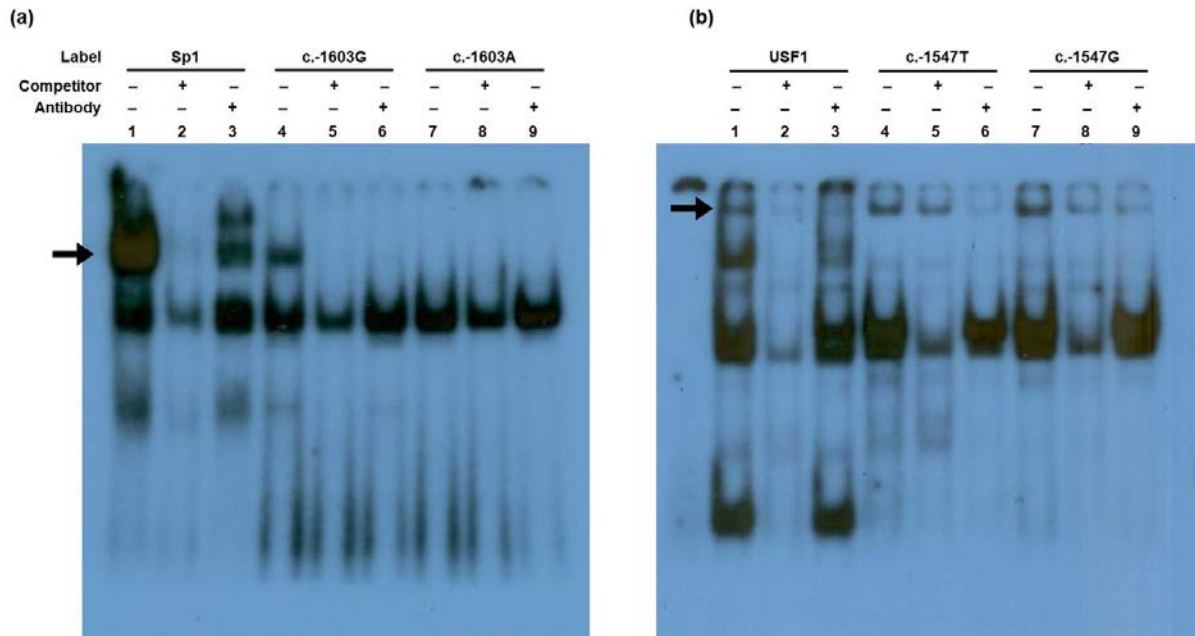

(a) Full-length image of Figure 2a shows the interaction between Sp1 and c.-1603G>A variant. Nuclear extracts were incubated with <sup>32</sup>P-labeled oligonucleotides (Sp1 consensus, lanes 1–3; c.-1603G wild type, lanes 4–6; c.-1603A variant, lanes 7–9). Competition assays and supershift assays were conducted with 100-fold molar excess of Sp1 consensus oligonucleotides (lanes 2, 5, and 8) and Sp1 antibody (lanes 3, 6, and 9), respectively. (b) Full-length image of Figure 2b shows the interaction between USF1 and c.-1547T>G variant. Nuclear extracts were incubated with <sup>32</sup>P-labeled oligonucleotides (USF1 consensus, lanes 1–3; c.-1547T wild type, lanes 4–6; c.-1547G variant, lanes 7–9). Competition and supershift assays were conducted with 100-fold molar excess of USF1 consensus oligonucleotides (lanes 2, 5, and 8) and USF1 antibody (lanes 3, 6, and 9), respectively. The arrows indicate the position of the DNA–protein complexes.

**Supplementary Table S1. Frequencies of *OCT3* genetic variations in promoter region from ASW/CEU/CHB population data**

| rs Number | Variation  | Minor allele | Frequency |       |       |
|-----------|------------|--------------|-----------|-------|-------|
|           |            |              | ASW       | CEU   | CHB   |
| rs520685  | c.-1603G>A | A            | 0.139     | 0.237 | 0.272 |
| rs520829  | c.-1547T>G | G            | 0.516     | 0.475 | 0.272 |
| rs555754  | c.-29G>A   | A            | 0.492     | 0.480 | 0.291 |

Data was obtained from 1000 Genomes Project (phase 3).

ASW (American of African Ancestry in SW USA), CEU (Utah Residents with Northern and Western European Ancestry), CHB (Han Chinese in Beijing, China).

**Supplementary Table S2. Frequencies of *MATE2K*, *MATE1*, *OCT2* functional promoter haplotypes or variants between *OCT3* control and variant groups**

| Genotype                                    | <i>OCT3</i>          |                      | <i>P</i> |
|---------------------------------------------|----------------------|----------------------|----------|
|                                             | control group (n=20) | variant group (n=25) |          |
| <i>MATE2K</i> control group                 | 15                   | 18                   | 0.821    |
| <i>MATE2K</i> variant group <sup>1</sup>    | 5                    | 7                    |          |
| <i>MATE1</i> rs2252281 wild type            | 15                   | 19                   | 1.000    |
| <i>MATE1</i> rs2252281 variant <sup>2</sup> | 5                    | 6                    |          |
| <i>MATE1</i> rs2289669 wild type            | 3                    | 8                    | 0.187    |
| <i>MATE1</i> rs2289669 variant <sup>2</sup> | 17                   | 17                   |          |
| <i>OCT2</i> rs316019 wild type              | 8                    | 14                   | 0.286    |
| <i>OCT2</i> rs316019 variant <sup>2</sup>   | 12                   | 11                   |          |

<sup>1</sup>The variant group included individuals who are homozygous for *MATE2K* haplotypes 1 or 2, which showed increased promoter activities in the previous *in vitro* assay.

<sup>2</sup>The variant group included individuals who are heterozygous or homozygous for a minor allele.

P-values were calculated by the  $\chi^2$ -test.

**Supplementary Table S3. Pharmacokinetic parameters of metformin according to the *OCT3* haplotype**

| Parameter                         | Control group<br>(n=20) | Variant group<br>(n=25)   |                        | <i>P</i> |
|-----------------------------------|-------------------------|---------------------------|------------------------|----------|
|                                   |                         | H2 heterozygote<br>(n=19) | H2 homozygote<br>(n=6) |          |
| F                                 | 0.41 ± 0.09             | 0.45 ± 0.10               | 0.48 ± 0.09            | 0.208    |
| AUC <sub>inf</sub><br>(ng/mL·h)   | 8950.21 ± 1684.45       | 10258.05 ± 1915.61        | 11240.21 ± 2399.73     | 0.044    |
| C <sub>max</sub><br>(ng/mL)       | 1492.15 ± 340.70        | 1699.88 ± 348.60          | 1821.63 ± 306.49       | 0.052    |
| T <sub>max</sub> <sup>1</sup> (h) | 1.50 (1-3)              | 1.50 (1-3)                | 1.75 (1-4)             | 0.327    |
| t <sub>1/2</sub> (h)              | 6.60 ± 1.98             | 7.14 ± 2.82               | 5.52 ± 1.85            | 0.289    |
| CL <sub>R</sub><br>(mL/min)       | 581.09 ± 97.12          | 554.89 ± 85.78            | 539.74 ± 105.75        | 0.671    |
| SrCL <sub>R</sub><br>(mL/min)     | 482.95 ± 103.15         | 453.08 ± 84.28            | 434.36 ± 103.21        | 0.559    |

The data shown represent arithmetic mean values ± SD.

<sup>1</sup>T<sub>max</sub> parameters were shown as median (range).

P-values were calculated by the Kruskal–Wallis test.

**Supplementary Table S4. Oligonucleotides used in the construction of *OCT3* reporter, *Sp1*, and *USF1* plasmids or in EMSA**

|                                                                               |                                                                         |
|-------------------------------------------------------------------------------|-------------------------------------------------------------------------|
| Primes for <i>OCT3</i> promoter cloning <sup>1</sup> (-1,642 to +15; 1,657bp) |                                                                         |
| Sense (XhoI site)                                                             | 5'-GTG <b>CCT CGA GGC</b> CTC TCT GAG CAG CCT TTT-3'                    |
| Antisense (HindIII site)                                                      | 5'-CGC <b>CAA GCT TGT</b> CGA AGG AGG GCA TGG TG-3'                     |
| Primes for <i>Sp1</i> cloning <sup>1</sup>                                    |                                                                         |
| Sense (HindIII site)                                                          | 5'- <b>AAG CTT</b> GTT CGC TTG CCT CGT CAG C -3'                        |
| Antisense (XhoI site)                                                         | 5'- <b>CTC GAG</b> TCC CGG GGT TAA GGG GTA TG -3'                       |
| Primes for <i>USF1</i> cloning <sup>1</sup>                                   |                                                                         |
| Sense (NheI site)                                                             | 5'- <b>GCT AGC</b> GGA TGT GCC CCC TCA CAG AG -3'                       |
| Antisense (XhoI site)                                                         | 5'- <b>CTC GAG</b> GCC CAA AGC CCC TGA ATC C -3'                        |
| Primers for <i>OCT3</i> mutagenesis PCR <sup>2</sup>                          |                                                                         |
| c.-1603G>A                                                                    | 5'-CCT TCT GGG TAA GGG <b>A</b> CA GGT TCT TCT GTG G-3'                 |
| c.-1547T>G                                                                    | 5'-GCA ATC AAC AAG GTA GAA CAG <b>G</b> TG ATT TCT TTA TGG CCA GTT T-3' |
| c.-29G>A                                                                      | 5'-CCG AGG CGC <b>G</b> AG CTG CGG GCG-3'                               |
| Oligonucleotides in EMSA                                                      |                                                                         |
| c.-1603G (wild type) <sup>2</sup>                                             | 5'-CTG GGT AAG <b>GGG</b> CAG GTT CTT C-3'                              |
| c.-1603A (variant) <sup>2</sup>                                               | 5'-CTG GGT AAG <b>GGA</b> CAG GTT CTT C-3'                              |
| <i>Sp1</i> consensus <sup>3</sup>                                             | 5'-ATT CGA TCG <b>GGG CGG GGC</b> GAG C-3'                              |
| c.-1547T (wild type) <sup>2</sup>                                             | 5'-AAG GTA GAA CAG <b>TTG</b> ATT TCT TTA T-3'                          |
| c.-1547G (variant) <sup>2</sup>                                               | 5'-AAG GTA GAA CAG <b>GTG</b> ATT TCT TTA T-3'                          |
| <i>USF1</i> consensus <sup>3</sup>                                            | 5'-GTG <b>TAG GCC ACG TGA CCG</b> GGT GTA AGC TTC-3'                    |

<sup>1</sup>The restriction endonuclease sites were marked by bold-faced letters with underlines.

<sup>2</sup>The SNP sites were marked by bold-faced letters with underlines.

<sup>3</sup>The consensus sequences of transcription factors were marked by bold-faced letters with underlines.
